# Supplementary material for: Exhaled Hydrogen as a Marker of Intestinal Fermentation Is Associated with Diarrhea in Kidney Transplant Recipients
Source: MDPI journal article supplement (doi:10.3390/jcm10132854), 2021-06-28
Supplement: s1 [file s1]

**Table S1.** Nutritional data

| Nutrients                 | Total<br>(n=199) | Exhaled H <sub>2</sub> , per group |                        |                            |
|---------------------------|------------------|------------------------------------|------------------------|----------------------------|
|                           |                  | 1.0-6.9 ppm<br>(n=68)              | 7.0-19.9 ppm<br>(n=61) | ≥20.0 ppm<br>(n=70)        |
| Energy, kcal              | 2053 (2465–3069) | 2605 (2067–3449)                   | 2445 (1987–2827)       | 2455 (2027–3050)           |
| Protein, % of energy      | 16.2 ± 37.6      | 15.8 ± 3.2                         | 16.3 ± 3.4             | 16.4 ± 2.9                 |
| Animal protein, g         | 64.5 ± 27.7      | 65.5 ± 27.8                        | 63.0 ± 28.2            | 64.8 ± 27.5                |
| Plant based protein, g    | 39.7 ± 18.8      | 40.9 ± 19.6                        | 36.2 ± 12.8            | 41.6 ± 21.9                |
| Lipids, % of energy       | 37.6 ± 5.9       | 38.6 ± 5.7                         | 37.8 ± 5.6             | 36.5 ± 6.4                 |
| Carbohydrate, % of energy | 42.0 ± 6.6       | 41.7 ± 6.7                         | 41.6 ± 6.5             | 42.8 ± 6.6                 |
| Mono and disaccharides, g | 121.3 ± 43.7     | 126.2 ± 45.4                       | 124.9 ± 35.5           | 113.6 ± 47.7 <sup>c</sup>  |
| Polysaccharides, g        | 149.9 ± 35.7     | 143.2 ± 38.7                       | 144.3 ± 28.3           | 161.0 ± 36.3 <sup>ab</sup> |
| Fiber, g                  | 26.5 ± 12.0      | 27.0 ± 12.3                        | 28.8 ± 11.3            | 27.5 ± 12.0                |
| Calcium, mg               | 1234 ± 604       | 1337 ± 661                         | 1138 ± 525             | 1218 ± 605                 |
| Iron, mg                  | 13.3 ± 5.0       | 13.5 ± 5.3                         | 12.8 ± 4.3             | 13.5 ± 5.4                 |
| Zinc, mg                  | 14.2 ± 5.5       | 14.5 ± 5.6                         | 13.4 ± 4.8             | 14.6 ± 5.8                 |
| Vitamin D, mcg            | 5.2 ± 2.8        | 5.2 ± 2.6                          | 4.9 ± 2.2              | 5.6 ± 3.3                  |
| Vitamin C, mg             | 97.3 ± 54.6      | 92.0 ± 62.7                        | 104.8 ± 51.1           | 95.8 ± 48.8                |
| Vitamin E, mg             | 17.9 ± 8.0       | 18.2 ± 8.3                         | 16.9 ± 6.2             | 18.6 ± 9.1                 |

*n* = 199 <sup>a</sup> vs G1 <sup>b</sup> vs G2 <sup>c</sup> trend vs 1 *p*=0.07. Data are presented as mean ± standard deviation or median with interquartile ranges (IQRs).

**Table S2.** Multivariate binary logistic regression results with exhaled H<sub>2</sub> (≥ or < 20 ppm) as dependent variable

| Potential determinants           | Regression coefficient | Wald X <sup>2</sup> value | <i>p</i> value | OR    | 95% CI of OR |       |
|----------------------------------|------------------------|---------------------------|----------------|-------|--------------|-------|
|                                  |                        |                           |                |       | Lower        | Upper |
| Polysaccharides intake, g        | 0.014                  | 6.00                      | 0.014          | 1.015 | 1.003        | 1.026 |
| Proton pump inhibitor use        | -0.389                 | 0.90                      | 0.344          | 0.678 | 0.303        | 1.517 |
| Mono and disaccharides intake, g | -0.009                 | 2.71                      | 0.099          | 0.991 | 0.981        | 1.002 |
| Tacrolimus trough levels, ug/L   | 0.088                  | 0.77                      | 0.381          | 1.092 | 0.897        | 1.328 |
| Vitamin C intake, mg             | -0.003                 | 0.51                      | 0.477          | 0.997 | 0.989        | 1.005 |
| Total cholesterol, mmol/L        | 0.012                  | 0.00                      | 0.984          | 1.012 | 0.329        | 3.111 |
| LDL-cholesterol, mmol/L          | -0.096                 | 0.22                      | 0.882          | 0.909 | 0.256        | 3.223 |

*n* = 196. Abbreviations: OR, odds ratio; CI, confidence interval; LDL, low-density lipoprotein.
